# Supplementary material for: A Modified Physical Disability Screening Model after Treatment in the Intensive Care Unit: A Nationwide Derivation-Validation Study
Source: MDPI journal article supplement (doi:10.3390/jcm11123251), 2022-06-07
Supplement: s1 [file s1]

TS1: Three predictor variables “education level”, “having a fracture”, and “inability to sit without support” according to binary ADL staircases in in derivation group

| Variables                        |         | Total (n=519) | Binary ADL staircases |                       | P-value |
|----------------------------------|---------|---------------|-----------------------|-----------------------|---------|
|                                  |         |               | No change (n=195)     | Getting worse (n=324) |         |
| Having Education                 | Yes (%) | 214 (41.2)    | 22 (11.3)             | 192 (59.3)            | <0.001  |
|                                  | No (%)  | 305 (58.8)    | 173 (88.7)            | 132 (40.7)            |         |
| Having a fracture                | Yes (%) | 92 (17.7)     | 5 (2.6)               | 87 (26.9)             | <0.001  |
|                                  | No (%)  | 427 (82.3)    | 190 (97.4)            | 237 (73.1)            |         |
| Inability to sit without support | Yes (%) | 291 (56.1)    | 64 (32.8)             | 227 (70.1)            | <0.001  |
|                                  | No (%)  | 228 (43.9)    | 131 (67.2)            | 97 (29.9)             |         |
